# Supplementary material
Source: ML conference proceedings conference paper supplement (https://openreview.net/forum?id=VLihM67Wdi6)
Supplement: supplementary_material [file attachment]

## 6 Data Collection

In all experiments, we use a legged Boston Dynamics Spot robot and collect robot experiences on eight different types of terrain around the university campus that we labeled as mulch, pebble sidewalk, cement sidewalk, grass, bushes, marbled rock, yellow bricks, and red bricks. The data is collected through human teleoperation (by the first and second authors) such that each trajectory contains a unique terrain throughout, with random trajectory shapes. Note that STERLING does not require a human expert to teleoperate the robot to collect robot experience nor does it require the experience to be gathered on a unique terrain per trajectory. We follow this data collection approach since it is easier to label the terrain for evaluation purposes. STERLING can also work with random trajectory lengths, with multiple terrains encountered along the same trajectory, without any semantic labels such as terrain names, and any navigation policy can be used for data collection. We record 8 trajectories per terrain, each five minutes long, and use 4 trajectories for training and the remaining for validation.

## 7 Planning at Deployment

Fig. 5 provides an overview of the cost inference process for local planning at deployment. To evaluate the terrain cost  $\mathcal{J}_{terrain}(\Gamma)$  for the constant-curvature arcs, we overlay the arcs on the bird’s eye view image, extract terrain patches at states along the arc, and compute the cost according to Eq. 2. We compute the visual representation, utility value, and terrain cost of all images at once as a single batch inference. Since the visual encoder and the utility function are relatively lightweight neural networks with about 0.5 million parameters, we are able to achieve real-time planning rates of 40 Hz using a laptop-grade Nvidia GPU.

## 8 Additional Experiments

In this section, we detail additional experiments performed to evaluate STERLING-features against baseline approaches.

### 8.1 Preference Alignment Evaluation

In addition to the evaluations of STERLING-features with baseline approaches in five environments as shown in Sec. 4, we utilize Env. 6 to further study adherence to operator preferences. We hypothesize that the discriminative features learned using STERLING is sufficient to learn the preference cost for local planning. To test this hypothesis, in Env. 6 containing three terrains as shown in Fig. 6, the operator provides two different preferences 6(a) and 6(b). While bush is the least preferred in both cases, in 6(a), sidewalk is more preferred than grass and in 6(b), both grass and sidewalk are equally preferred. We see in Fig. 6 that using STERLING features, the planner is able to sufficiently distinguish the terrains and reach the goal while adhering to operator preferences. Although SE-R [5] adheres to operator preference in 6(b), it incorrectly maps grass to bush, assigning a higher cost and taking a longer

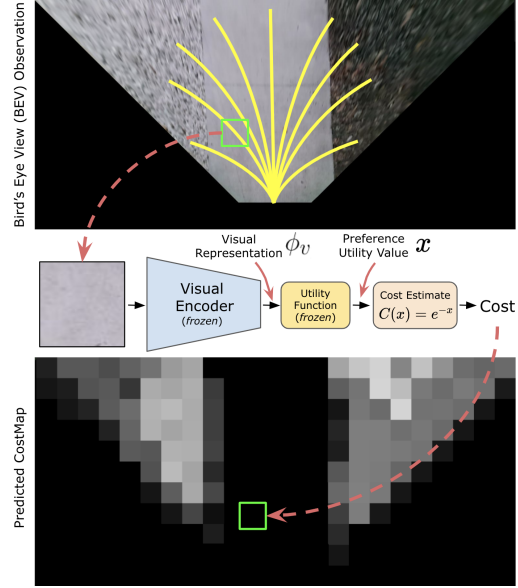

Figure 5: An overview of the cost inference process for local planning at deployment. The constant-curvature arcs (yellow) are overlaid on the BEV image, and the terrain cost  $\mathcal{J}_{terrain}(\Gamma)$  is computed on patches extracted along all arcs. White is high cost and black is low cost.

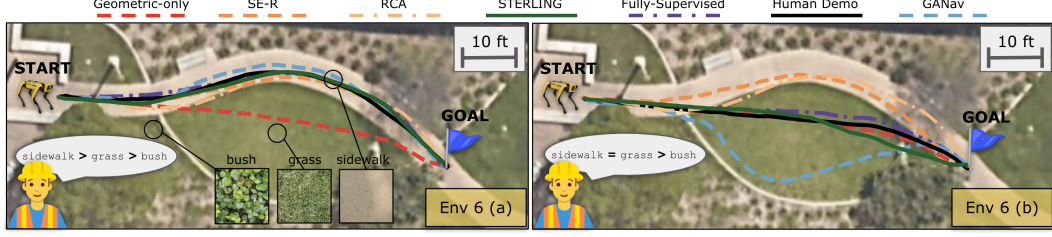

Figure 6: Trajectories traced by different approaches for the task of preference-aligned off-road navigation. Shown here are two different preferences expressed by the operator in the same environment—in 6 (a), sidewalk is more preferred than grass which is more preferred than bush, and in 6 (b), grass and sidewalk are equally preferred and bush is least preferred. We see that without retraining the terrain features, in both cases (a) and (b), STERLING optimally navigates to the goal while adhering to operator preferences.

467 route to reach the goal. On the other hand, RCA [16] fails to adhere to operator preferences since it  
 468 directly assigns traversability costs using inertial features.

## 469 8.2 Evaluating Self-Supervision Objectives

470 In this subsection, we investigate the effective-  
 471 ness of STERLING at learning discriminative  
 472 terrain features and compare with base-  
 473 line unsupervised terrain representation learn-  
 474 ing methods such as Regularized Auto-Encoder  
 475 (RAE) and SE-R [5]. STERLING uses multi-  
 476 modal correlation ( $\mathcal{L}_{MM}$ ) and viewpoint in-  
 477 variance ( $\mathcal{L}_{VI}$ ) objectives for self-supervised  
 478 representation learning, whereas, SE-R and RAE  
 479 use soft-triplet-contrastive loss and pixel-wise  
 480 reconstruction loss, respectively. Additionally,  
 481 we also perform an ablation study on the two  
 482 objectives in STERLING to understand their  
 483 contributions to learning discriminative terrain  
 484 features. To evaluate different visual represen-  
 485 tations, we perform unsupervised classification  
 486 using k-means clustering and compare their re-  
 487 lative classification accuracies with manually la-  
 488 beled terrain labels. For this experiment, we  
 489 train STERLING, SE-R, and RAE on our training  
 490 set and evaluate on a held-out validation set. Fig.  
 491 7 shows the results of this study. We see that  
 492 STERLING-features using both the self-supervision  
 493 objectives perform the best among all methods.  
 494 Additionally, we see that using a non-contrastive  
 495 representation learning approach such as VICReg [26]  
 within STERLING performs better than contrastive  
 learning methods such as SE-R, and reconstruction-  
 based methods such as RAE. This study shows  
 that the proposed self-supervision objectives in  
 STERLING indeed help learn discriminative terrain  
 features.

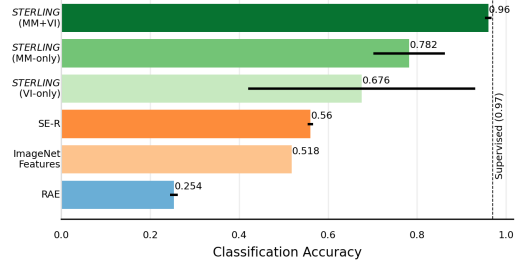

Figure 7: Ablation study depicting classification accuracy (value closer to 1.0 is better) from terrain representations learned using different approaches and objectives. The combined objective (VI + MM) proposed in STERLING achieves the highest accuracy, indicating that the learned representations are sufficiently discriminative of terrains.
